# Supplementary material for: Comparative Proteomics of Extended-Spectrum Cephalosporin-Resistant Neisseria gonorrhoeae Isolates Demonstrates Altered Protein Synthesis, Metabolism, Substance Transport, and Membrane Permeability
Source: Front Microbiol. 2020 Feb 19;11:169. doi: 10.3389/fmicb.2020.00169 (PMC7042406; doi:10.3389/fmicb.2020.00169)
Supplement: DATA SHEET S2 — The enriched terms for biological process, molecule function and cellular component. [file Data_Sheet_2.xlsx]

## Sheet: BIOLOGICAL_PROCESS
GO.ID	GO.Name	Level	FDR	P.Value	Peotein Numbers	IDs
GO:0060255	regulation of macromolecule metabolic process	4	0.00221479	9.59481e-07	16	A0A0M3GXZ1, A0A0M3GY07, A0A0M3GY33, A0A1D3EAW7, A0A1D3ETI2, A0A1D3F5Y3, A0A1D3FQV3, A0A1D3FRE4, A0A1D3H2B5, A0A1D3HMR0, A0A1P8DWD0, D6H4Z6, D6H7Z2, Q5EP84, Q5F5L9, Q5F6D2
GO:0019222	regulation of metabolic process	3	0.00221479	1.51129e-06	16	A0A0M3GXZ1, A0A0M3GY07, A0A0M3GY33, A0A1D3EAW7, A0A1D3ETI2, A0A1D3F5Y3, A0A1D3FQV3, A0A1D3FRE4, A0A1D3H2B5, A0A1D3HMR0, A0A1P8DWD0, D6H4Z6, D6H7Z2, Q5EP84, Q5F5L9, Q5F6D2
GO:0010468	regulation of gene expression	5	0.00273945	4.03647e-06	14	A0A0M3GXZ1, A0A0M3GY07, A0A0M3GY33, A0A1D3ETI2, A0A1D3F5Y3, A0A1D3FQV3, A0A1D3FRE4, A0A1D3HMR0, A0A1P8DWD0, D6H4Z6, D6H7Z2, Q5EP84, Q5F5L9, Q5F6D2
GO:0051171	regulation of nitrogen compound metabolic process	4	0.00273945	4.64318e-06	15	A0A0M3GXZ1, A0A0M3GY07, A0A0M3GY33, A0A1D3EAW7, A0A1D3ETI2, A0A1D3F5Y3, A0A1D3FQV3, A0A1D3FRE4, A0A1D3H2B5, A0A1D3HMR0, A0A1P8DWD0, D6H4Z6, D6H7Z2, Q5EP84, Q5F6D2
GO:0031323	regulation of cellular metabolic process	4	0.00273945	5.02543e-06	15	A0A0M3GXZ1, A0A0M3GY07, A0A0M3GY33, A0A1D3EAW7, A0A1D3ETI2, A0A1D3F5Y3, A0A1D3FQV3, A0A1D3FRE4, A0A1D3H2B5, A0A1D3HMR0, A0A1P8DWD0, D6H4Z6, D6H7Z2, Q5EP84, Q5F6D2
GO:0080090	regulation of primary metabolic process	4	0.00273945	5.60787e-06	15	A0A0M3GXZ1, A0A0M3GY07, A0A0M3GY33, A0A1D3EAW7, A0A1D3ETI2, A0A1D3F5Y3, A0A1D3FQV3, A0A1D3FRE4, A0A1D3H2B5, A0A1D3HMR0, A0A1P8DWD0, D6H4Z6, D6H7Z2, Q5EP84, Q5F6D2
GO:2000112	regulation of cellular macromolecule biosynthetic process	6	0.00616322	1.74553e-05	13	A0A0M3GXZ1, A0A0M3GY07, A0A0M3GY33, A0A1D3ETI2, A0A1D3F5Y3, A0A1D3FQV3, A0A1D3FRE4, A0A1D3HMR0, A0A1P8DWD0, D6H4Z6, D6H7Z2, Q5EP84, Q5F6D2
GO:0010556	regulation of macromolecule biosynthetic process	5	0.00616322	1.74553e-05	13	A0A0M3GXZ1, A0A0M3GY07, A0A0M3GY33, A0A1D3ETI2, A0A1D3F5Y3, A0A1D3FQV3, A0A1D3FRE4, A0A1D3HMR0, A0A1P8DWD0, D6H4Z6, D6H7Z2, Q5EP84, Q5F6D2
GO:0031326	regulation of cellular biosynthetic process	5	0.00616322	1.89249e-05	13	A0A0M3GXZ1, A0A0M3GY07, A0A0M3GY33, A0A1D3ETI2, A0A1D3F5Y3, A0A1D3FQV3, A0A1D3FRE4, A0A1D3HMR0, A0A1P8DWD0, D6H4Z6, D6H7Z2, Q5EP84, Q5F6D2
GO:0009889	regulation of biosynthetic process	4	0.0062034	2.11648e-05	13	A0A0M3GXZ1, A0A0M3GY07, A0A0M3GY33, A0A1D3ETI2, A0A1D3F5Y3, A0A1D3FQV3, A0A1D3FRE4, A0A1D3HMR0, A0A1P8DWD0, D6H4Z6, D6H7Z2, Q5EP84, Q5F6D2
GO:0051252	regulation of RNA metabolic process	6	0.0550468	0.00020659	11	A0A0M3GXZ1, A0A0M3GY33, A0A1D3EAW7, A0A1D3F5Y3, A0A1D3FRE4, A0A1D3H2B5, A0A1P8DWD0, D6H4Z6, D6H7Z2, Q5EP84, Q5F6D2
GO:0019219	regulation of nucleobase-containing compound metabolic process	5	0.0639207	0.000261702	11	A0A0M3GXZ1, A0A0M3GY33, A0A1D3EAW7, A0A1D3F5Y3, A0A1D3FRE4, A0A1D3H2B5, A0A1P8DWD0, D6H4Z6, D6H7Z2, Q5EP84, Q5F6D2
GO:0050789	regulation of biological process	2	0.087656	0.000388785	17	A0A0M3GXZ1, A0A0M3GY07, A0A0M3GY33, A0A1D3EAW7, A0A1D3ETI2, A0A1D3F5Y3, A0A1D3FQV3, A0A1D3FRE4, A0A1D3GCU7, A0A1D3H2B5, A0A1D3HMR0, A0A1P8DWD0, D6H4Z6, D6H7Z2, Q5EP84, Q5F5L9, Q5F6D2
GO:0065007	biological regulation	1	0.151313	0.000722752	19	A0A0M3GXZ1, A0A0M3GY07, A0A0M3GY33, A0A1D3EAW7, A0A1D3ETI2, A0A1D3F5Y3, A0A1D3FQV3, A0A1D3FRE4, A0A1D3GCU7, A0A1D3H2B5, A0A1D3HMR0, A0A1P8DWD0, D6H4Z6, D6H7Z2, D6H8V1, D6H9Y3, Q5EP84, Q5F5L9, Q5F6D2
GO:0006355	regulation of transcription, DNA-templated	9	0.162765	0.000944046	9	A0A0M3GXZ1, A0A0M3GY33, A0A1D3F5Y3, A0A1D3FRE4, A0A1P8DWD0, D6H4Z6, D6H7Z2, Q5EP84, Q5F6D2
GO:1903506	regulation of nucleic acid-templated transcription	8	0.162765	0.000944046	9	A0A0M3GXZ1, A0A0M3GY33, A0A1D3F5Y3, A0A1D3FRE4, A0A1P8DWD0, D6H4Z6, D6H7Z2, Q5EP84, Q5F6D2
GO:2001141	regulation of RNA biosynthetic process	7	0.162765	0.000944046	9	A0A0M3GXZ1, A0A0M3GY33, A0A1D3F5Y3, A0A1D3FRE4, A0A1P8DWD0, D6H4Z6, D6H7Z2, Q5EP84, Q5F6D2
GO:0044764	multi-organism cellular process	2	0.20341	0.00124919	3	A0A0M3GXE9, A0A171IPV7, A0A1D3FK04
GO:0009081	branched-chain amino acid metabolic process	7	0.300653	0.00194896	5	A0A0M3GYR8, A0A1D3FF29, D6H9Y3, D6HBH4, Q5F8G6
GO:0050794	regulation of cellular process	3	0.485549	0.00347886	15	A0A0M3GXZ1, A0A0M3GY07, A0A0M3GY33, A0A1D3EAW7, A0A1D3ETI2, A0A1D3F5Y3, A0A1D3FQV3, A0A1D3FRE4, A0A1D3H2B5, A0A1D3HMR0, A0A1P8DWD0, D6H4Z6, D6H7Z2, Q5EP84, Q5F6D2
GO:0051704	multi-organism process	1	0.688153	0.00540004	4	A0A0M3GXE9, A0A171IPV7, A0A1D3FK04, B4RQR4
GO:0006448	regulation of translational elongation	8	0.728006	0.00610013	3	A0A0M3GY07, A0A1D3ETI2, A0A1D3HMR0
GO:0000746	conjugation	3	0.728006	0.00620954	2	A0A0M3GXE9, A0A1D3FK04
GO:0010608	posttranscriptional regulation of gene expression	6	0.773326	0.00817916	4	A0A0M3GY07, A0A1D3ETI2, A0A1D3FQV3, A0A1D3HMR0
GO:0032268	regulation of cellular protein metabolic process	6	0.773326	0.00817916	4	A0A0M3GY07, A0A1D3ETI2, A0A1D3FQV3, A0A1D3HMR0
GO:0006417	regulation of translation	7	0.773326	0.00817916	4	A0A0M3GY07, A0A1D3ETI2, A0A1D3FQV3, A0A1D3HMR0
GO:0051246	regulation of protein metabolic process	5	0.773326	0.00817916	4	A0A0M3GY07, A0A1D3ETI2, A0A1D3FQV3, A0A1D3HMR0
GO:0034248	regulation of cellular amide metabolic process	5	0.773326	0.00817916	4	A0A0M3GY07, A0A1D3ETI2, A0A1D3FQV3, A0A1D3HMR0
GO:0006549	isoleucine metabolic process	8	0.978457	0.0106826	4	A0A0M3GYR8, D6H9Y3, D6HBH4, Q5F8G6
GO:0009820	alkaloid metabolic process	4	1	0.0225999	2	A0A1D3IB26, B4RP77
GO:0001558	regulation of cell growth	5	1	0.0244587	1	D6H7Z2
GO:0040008	regulation of growth	3	1	0.0244587	1	D6H7Z2
GO:0009291	unidirectional conjugation	4	1	0.0292789	1	A0A1D3FK04
GO:0006573	valine metabolic process	8	1	0.0376346	3	A0A0M3GYR8, D6HBH4, Q5F8G6
GO:0006551	leucine metabolic process	8	1	0.0376346	3	A0A0M3GYR8, D6HBH4, Q5F8G6
GO:0046295	glycolate biosynthetic process	8	1	0.0388487	1	A0A0M3H1P4
GO:0009372	quorum sensing	3	1	0.0388487	1	A0A171IPV7
GO:0034309	primary alcohol biosynthetic process	6	1	0.0388487	1	A0A0M3H1P4
GO:0000453	enzyme-directed rRNA 2'-O-methylation	13	1	0.0388487	1	A0A1D3HC40
GO:0009441	glycolate metabolic process	7	1	0.0388487	1	A0A0M3H1P4
GO:0009097	isoleucine biosynthetic process	9	1	0.0421911	3	A0A0M3GYR8, D6H9Y3, Q5F8G6
GO:0009082	branched-chain amino acid biosynthetic process	8	1	0.0421911	3	A0A0M3GYR8, D6H9Y3, Q5F8G6
GO:0016485	protein processing	6	1	0.0435986	1	Q5F7W9
GO:0009450	gamma-aminobutyric acid catabolic process	8	1	0.0435986	1	D6H8V1
GO:0009448	gamma-aminobutyric acid metabolic process	7	1	0.0435986	1	D6H8V1

## Sheet: MOLECULAR_FUNCTION
GO.ID	GO.Name	Level	FDR	P.Value	Peotein Numbers	IDs
GO:0008135	translation factor activity, RNA binding	5	0.475088	0.00324181	4	A0A0M3GY07, A0A1D3ETI2, A0A1D3FQV3, A0A1D3HMR0
GO:0003746	translation elongation factor activity	6	0.56861	0.00426797	3	A0A0M3GY07, A0A1D3ETI2, A0A1D3HMR0
GO:0036440	citrate synthase activity	5	1	0.0244587	1	Q5F873
GO:0004108	citrate (Si)-synthase activity	6	1	0.0244587	1	Q5F873
GO:0097351	toxin-antitoxin pair type II binding	3	1	0.0244587	1	D6H7Z2
GO:0047635	alanine-oxo-acid transaminase activity	5	1	0.0292789	1	A0A1D3IB26
GO:0052654	L-leucine transaminase activity	6	1	0.0292789	1	A0A1D3FF29
GO:0052655	L-valine transaminase activity	6	1	0.0292789	1	A0A1D3FF29
GO:0052656	L-isoleucine transaminase activity	6	1	0.0292789	1	A0A1D3FF29
GO:0004084	branched-chain-amino-acid transaminase activity	5	1	0.0292789	1	A0A1D3FF29
GO:0004655	porphobilinogen synthase activity	5	1	0.0292789	1	Q5F9K8
GO:0005315	inorganic phosphate transmembrane transporter activity	5	1	0.0292789	1	A0A0M3GXA3
GO:0008797	aspartate ammonia-lyase activity	5	1	0.0292789	1	A0A0M3GY82
GO:0004021	L-alanine:2-oxoglutarate aminotransferase activity	6	1	0.0292789	1	A0A1D3IB26
GO:0004073	aspartate-semialdehyde dehydrogenase activity	5	1	0.0340755	1	D6H9Y3
GO:0004022	alcohol dehydrogenase (NAD) activity	5	1	0.0340755	1	Q5F6V3
GO:0004368	glycerol-3-phosphate dehydrogenase (quinone) activity	5	1	0.0340755	1	A0A1D3FRE4
GO:0052591	sn-glycerol-3-phosphate:ubiquinone-8 oxidoreductase activity	7	1	0.0340755	1	A0A1D3FRE4
GO:0052590	sn-glycerol-3-phosphate:ubiquinone oxidoreductase activity	6	1	0.0340755	1	A0A1D3FRE4
GO:0050661	NADP binding	5	1	0.0357639	3	B4RP77, D6H9Y3, D6HAT4
GO:0008442	3-hydroxyisobutyrate dehydrogenase activity	5	1	0.0388487	1	D6HBH4
GO:0070677	rRNA (cytosine-2'-O-)-methyltransferase activity	8	1	0.0388487	1	A0A1D3HC40
GO:0043718	2-hydroxymethylglutarate dehydrogenase activity	5	1	0.0435986	1	D6HBH4
GO:0008703	5-amino-6-(5-phosphoribosylamino)uracil reductase activity	5	1	0.0435986	1	D6HAT4
GO:0008835	diaminohydroxyphosphoribosylaminopyrimidine deaminase activity	5	1	0.0435986	1	D6HAT4
GO:0003676	nucleic acid binding	3	1	0.0497379	20	A0A0M3GY07, A0A0M3GY25, A0A0M3GY33, A0A0M3GYR8, A0A171IPU8, A0A1D3ETI2, A0A1D3F5Y3, A0A1D3FK04, A0A1D3FQV3, A0A1D3FRE4, A0A1D3H2B5, A0A1D3HLT9, A0A1D3HMR0, A0A1D3IYI7, A0A1D3J1M4, A0A1P8DWD0, D6H4Z6, D6H7Z2, D6H955, Q5F6C9

## Sheet: CELLULAR_COMPONENT
GO.ID	GO.Name	Level	FDR	P.Value	Peotein Numbers	IDs
GO:0005840	ribosome	5	1	0.0139056	6	A0A0M3GY07, A0A1D3ETI2, A0A1D3FQV3, A0A1D3HMR0, A0A1D3J1M4, B4RL59
GO:0043232	intracellular non-membrane-bounded organelle	4	1	0.0183534	7	A0A0M3GY07, A0A1D3ETI2, A0A1D3FQV3, A0A1D3HLT9, A0A1D3HMR0, A0A1D3J1M4, B4RL59
GO:0043229	intracellular organelle	3	1	0.0183534	7	A0A0M3GY07, A0A1D3ETI2, A0A1D3FQV3, A0A1D3HLT9, A0A1D3HMR0, A0A1D3J1M4, B4RL59
GO:0043228	non-membrane-bounded organelle	2	1	0.0183534	7	A0A0M3GY07, A0A1D3ETI2, A0A1D3FQV3, A0A1D3HLT9, A0A1D3HMR0, A0A1D3J1M4, B4RL59
GO:0043226	organelle	1	1	0.0183534	7	A0A0M3GY07, A0A1D3ETI2, A0A1D3FQV3, A0A1D3HLT9, A0A1D3HMR0, A0A1D3J1M4, B4RL59
GO:1990904	ribonucleoprotein complex	2	1	0.0336558	6	A0A0M3GY07, A0A1D3ETI2, A0A1D3FQV3, A0A1D3HMR0, A0A1D3J1M4, B4RL59
